# Supplementary material for: Warming Increases Pollen Lipid Concentration in an Invasive Thistle, with Minor Effects on the Associated Floral-Visitor Community
Source: PubMed Central journal article supplement (PMC7022432; doi:10.3390/insects11010020), 2019-12-25
Supplement: insects-11-00020-s001.pdf [file insects-11-00020-s001.pdf]

## Supplemental Materials

**Table 1.** Results of additional GLMMs.

| Group                                   | Response variable         | Distribution                     | Comparison     | Variable type | Effect Size | z or t value | P value         |
|-----------------------------------------|---------------------------|----------------------------------|----------------|---------------|-------------|--------------|-----------------|
| <b>Observed non-bee flower-visitors</b> | log transformed Abundance | <i>gaussian(link="identity")</i> | OTC - Ambient  | categorical   | 0.09        | 1.19         | 0.24            |
|                                         |                           | <i>gaussian(link="identity")</i> | Inflorescences | continuous    | 0.04        | 6.18         | << <b>0.001</b> |
| <b>Observed bee flower-visitors</b>     | log transformed Abundance | <i>gaussian(link="identity")</i> | OTC - Ambient  | categorical   | 0.08        | 1.18         | 0.24            |
|                                         |                           | <i>gaussian(link="identity")</i> | Inflorescences | continuous    | 0.04        | 8.43         | << <b>0.001</b> |

**Table 2.** Bee species collected on *C. nutans*.

| <b>Family</b> | <b>Morphotype</b> | <b>Species</b>                    | <b>Count</b> |
|---------------|-------------------|-----------------------------------|--------------|
| Halictidae    | Green Sweat Bee   | <i>Agapostemon virescens</i>      | 7            |
| Andrenidae    | Large Dark Bee    | <i>Andrena crataegi</i>           | 1            |
| Andrenidae    | Large Dark Bee    | <i>Andrena nuda</i>               | 1            |
| Andrenidae    | Large Dark Bee    | <i>Andrena perplexa</i>           | 1            |
| Apidae        | Honeybee          | <i>Apis mellifera</i>             | 11           |
| Halictidae    | Green Sweat Bee   | <i>Augochlorella aurata</i>       | 1            |
| Apidae        | Bumblebee         | <i>Bombus bimaculatus</i>         | 132          |
| Apidae        | Bumblebee         | <i>Bombus griseocollis</i>        | 5            |
| Apidae        | Bumblebee         | <i>Bombus impatiens</i>           | 8            |
| Apidae        | Bumblebee         | <i>Bombus perplexus</i>           | 19           |
| Apidae        | Bumblebee         | <i>Bombus terricola</i>           | 1            |
| Apidae        | Bumblebee         | <i>Bombus vagans</i>              | 5            |
| Apidae        | Small Dark Bee    | <i>Ceratina calcarata</i>         | 1            |
| Apidae        | Small Dark Bee    | <i>Ceratina sp.</i>               | 1            |
| Halictidae    | Small Dark Bee    | <i>Halictus confusus</i>          | 1            |
| Halictidae    | Small Dark Bee    | <i>Halictus ligatus</i>           | 28           |
| Halictidae    | Small Dark Bee    | <i>Halictus rubicundus</i>        | 2            |
| Halictidae    | Small Dark Bee    | <i>Lasioglossum hitchensi</i>     | 5            |
| Halictidae    | Small Dark Bee    | <i>Lasioglossum leucozonium</i>   | 2            |
| Halictidae    | Small Dark Bee    | <i>Lasioglossum oceanicum</i>     | 1            |
| Halictidae    | Small Dark Bee    | <i>Lasioglossum paradmirandum</i> | 4            |
| Halictidae    | Small Dark Bee    | <i>Lasioglossum pectorale</i>     | 2            |
| Halictidae    | Small Dark Bee    | <i>Lasioglossum trigeminum</i>    | 1            |
| Halictidae    | Small Dark Bee    | <i>Lasioglossum versatum</i>      | 4            |
|               | Dark Hairy Belly  |                                   |              |
| Megachilidae  | Bee               | <i>Megachile pugnata</i>          | 2            |
|               | Dark Hairy Belly  |                                   |              |
| Megachilidae  | Bee               | <i>Megachile relativa</i>         | 1            |
|               | Dark Hairy Belly  |                                   |              |
| Megachilidae  | Bee               | <i>Megachile rotundata</i>        | 1            |
| Apidae        | Hairy Leg Bee     | <i>Melissodes desponsa</i>        | 23           |
|               | Large Carpenter   |                                   |              |
| Apidae        | Bee               | <i>Xylocopa virginica</i>         | 3            |

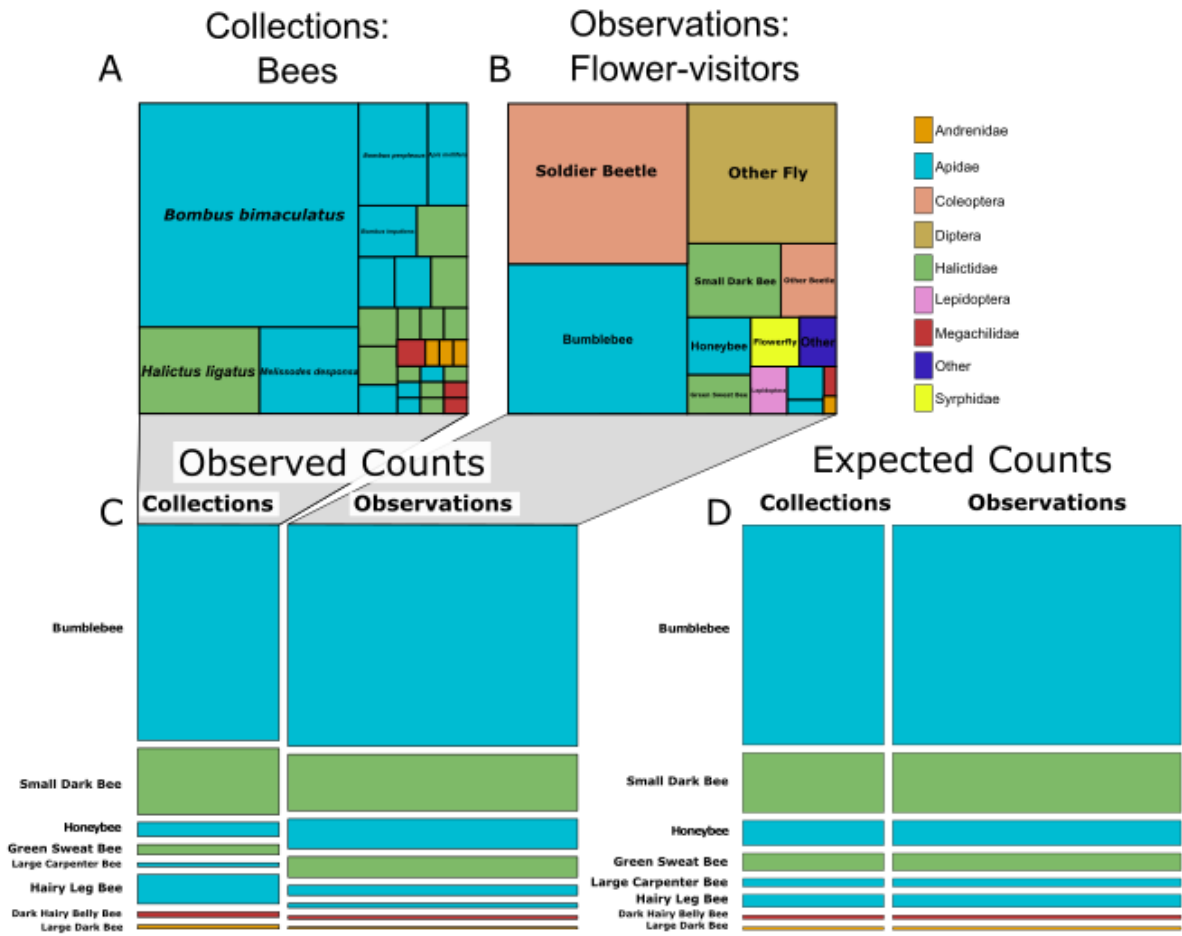

**Figure 1.** Treemaps showing the relative abundances of different morphotypes in observed flower-visiting insects (A) and the species of collected bees (B), as well as a comparison of the observed counts of bee morphotypes in collections and observations (C) with the expected counts if there were no difference between observations and collections (D). Colours refer to the order or family of the insects.
